# Supplementary material for: Screening of a natural compound library identifies emodin, a natural compound from Rheum palmatum Linn that inhibits DPP4
Source: PeerJ. 2017 May 10;5:e3283. doi: 10.7717/peerj.3283 (PMC5428354; doi:10.7717/peerj.3283)
Supplement: Data S2 [file peerj-05-3283-s002.xlsx]

## Sheet: Sheet1
% of DMSO		DMSO			Emodin
	0 hr	105	95	100	55	58	62
	8 hr	98	90	95	90	88	85
RLU		DMSO			Emodin
	0 hr	5250000	4750000	5000000	2750000	2900000	3100000
	8 hr	4900000	4500000	4750000	4500000	4400000	4250000
