# Supplementary material for: Screening of a natural compound library identifies emodin, a natural compound from Rheum palmatum Linn that inhibits DPP4
Source: PeerJ. 2017 May 10;5:e3283. doi: 10.7717/peerj.3283 (PMC5428354; doi:10.7717/peerj.3283)
Supplement: Data S3 [file peerj-05-3283-s003.xlsx]

## Sheet: Figure_2_A
			Emission (450 nm)					% of Ctrl
			Exp #1	Exp #2	Exp #3	Exp #4	Exp #5
		DMSO (Ctrl)	26324	29831	27248	49726	55679	94.7	107.3	98.0	94.4	105.6
		Emodin	25326	25088	25860	47385	48311	91.1	90.2	93.0	89.9	91.7
		Aloe-emodin	28333	31255	28705	40933	31387	101.9	112.4	103.3	77.7	59.6
		Rheochrysidin	27958	24886	26399	56086	41212	100.6	89.5	95.0	106.4	78.2
		Chrysophanol	27057	31330	23865	45793	40995	97.3	112.7	85.8	86.9	77.8
		Rhein	13317	11514	12434	38251	28909	47.9	41.4	44.7	72.6	54.9

## Sheet: Figure_2_B
		Emission (450 nm)			% of Ctrl
		Well #1	Well #2	Well #3
	DMSO (Ctrl)	46364	50379	49407	95.2	103.4	101.4
	Emodin	47887	46825	46023	98.3	96.1	94.5
	Aloe-emodin	45255	48696	44751	92.9	100.0	91.9
	Rheochrysidin	49845	45873	51642	102.3	94.2	106.0
	Chrysophanol	43157	48875	45154	88.6	100.3	92.7
	Rhein	41706	44766	43536	85.6	91.9	89.4
